# Supplementary material
Source: MDPI journal article supplement (https://www.mdpi.com/2073-4433/14/12/1718)
Supplement: s1 [file s1]

# Supplementary Materials for Assessment of the Spatiotemporal Changes in the Extreme Precipitation Climate Indices over the Chungcheong Region of South Korea during 1973–2020

Hyungon Cho <sup>1,†</sup>, Bashir Adelodun <sup>2,3,4,\*</sup>, Hyo-Jeong Kim <sup>1</sup> and Gwangseob Kim <sup>1,\*</sup>

1 Department of Civil Engineering, Kyungpook National University, Daegu 41566, Republic of Korea; chohg@knu.ac.kr (H.C.); kimhjgg@knu.ac.kr (H.-J.K.)

2 Department of Agricultural Civil Engineering, Kyungpook National University, Daegu 41566, Republic of Korea

3 Department of Agricultural and Biosystems Engineering, University of Ilorin, PMB 1515, Ilorin 240003, Nigeria

4 Institute of Agricultural Science & Technology, Kyungpook National University, Daegu 41566, Republic of Korea

\* Correspondence: adelodun.b@unilorin.edu.ng (B.A.); kims@knu.ac.kr (G.K.)

† These authors contributed equally to this work.

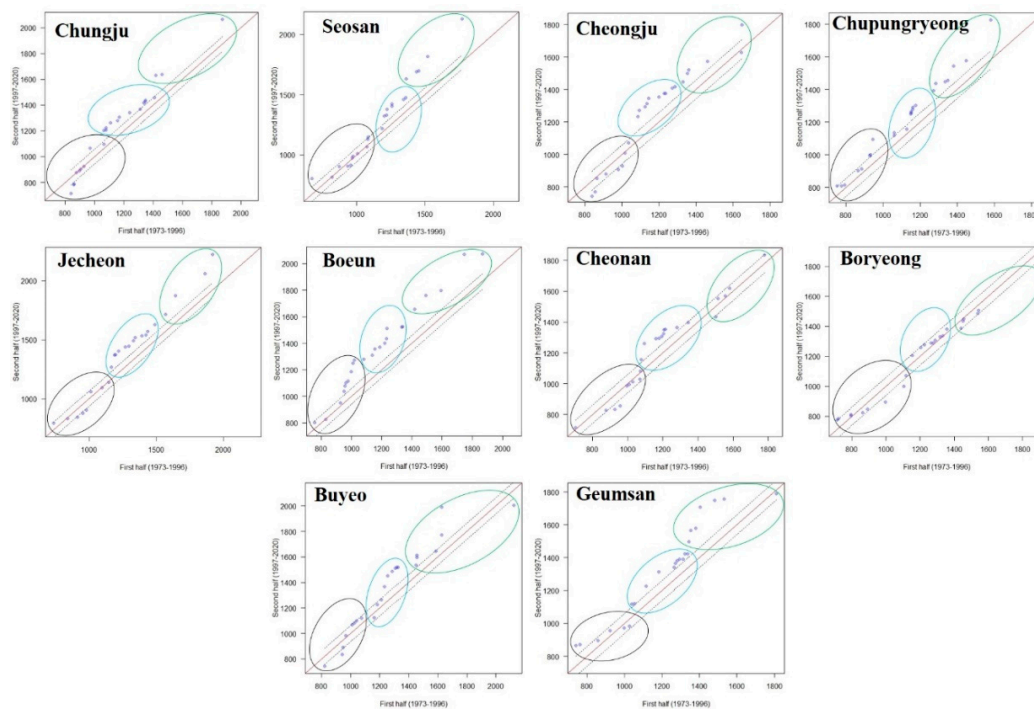

Figure S1. Innovative trend analysis plots for PRCPTOT.

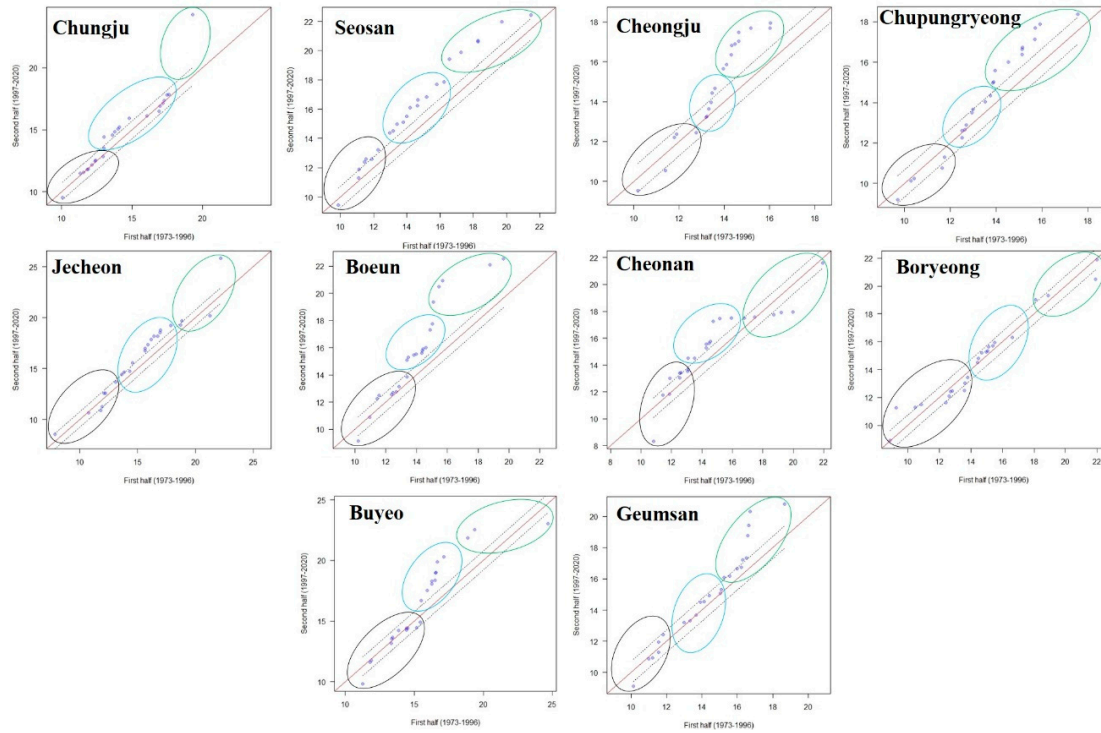

Figure S2. Innovative trend analysis plots for SDII.

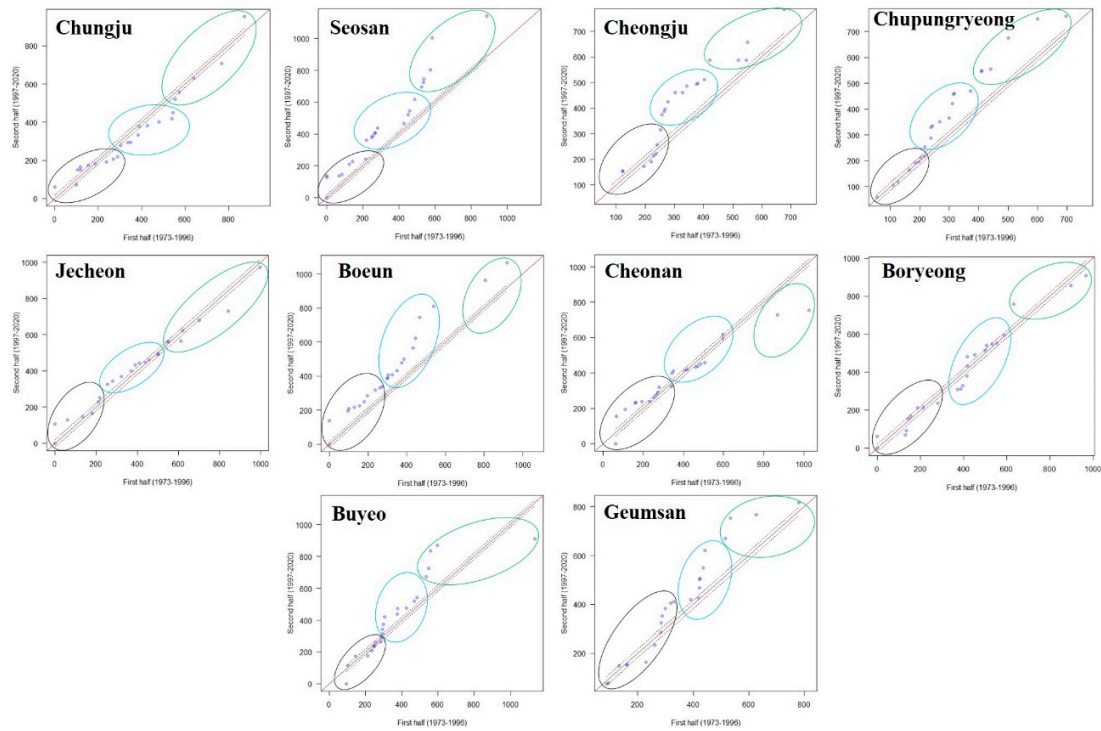

Figure S3. Innovative trend analysis plots for R95p.

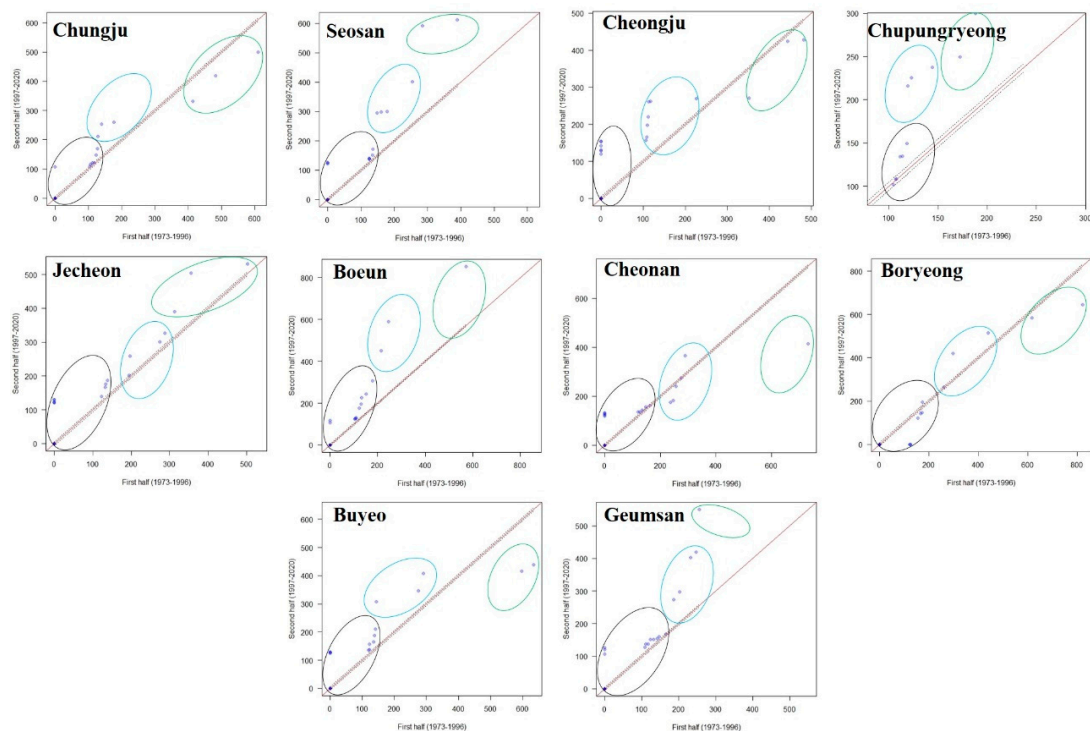

Figure S4. Innovative trend analysis plots for R99p.

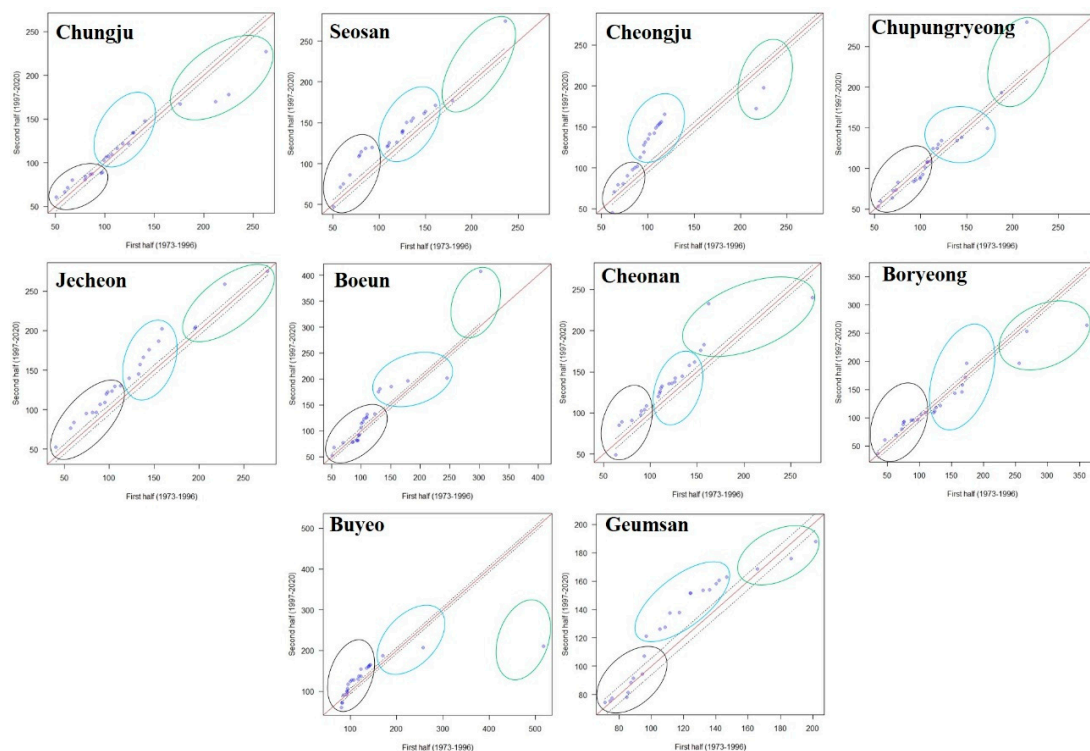

Figure S5. Innovative trend analysis plots for Rx1day.

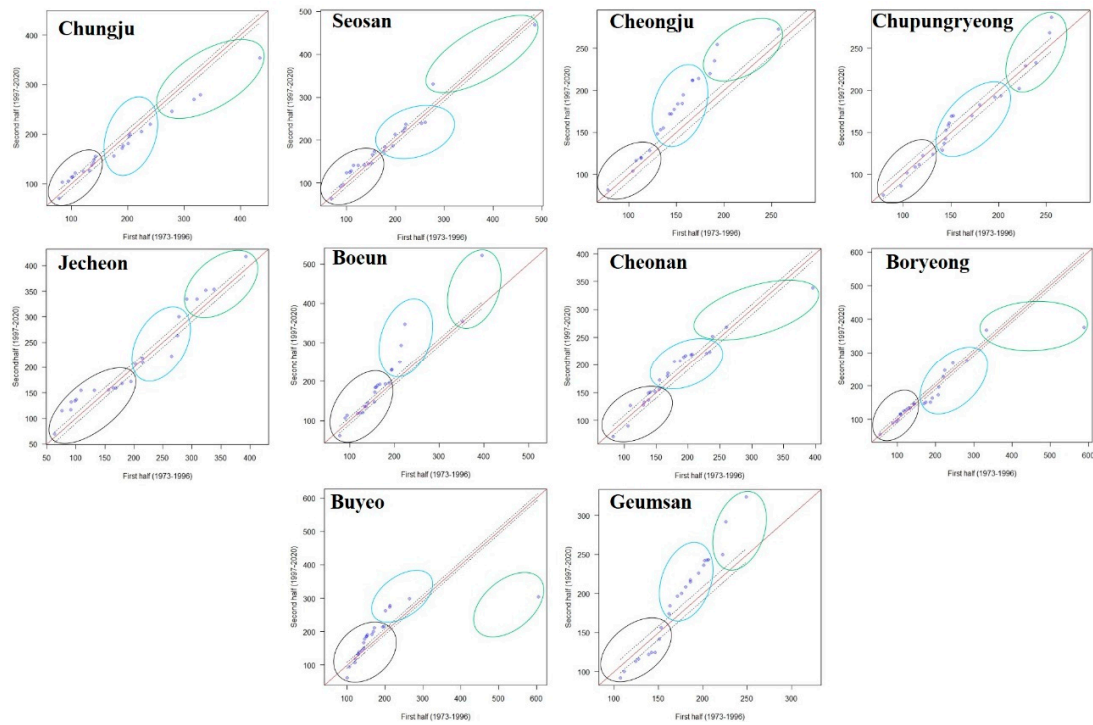

Figure S6. Innovative trend analysis plots for Rx3day.

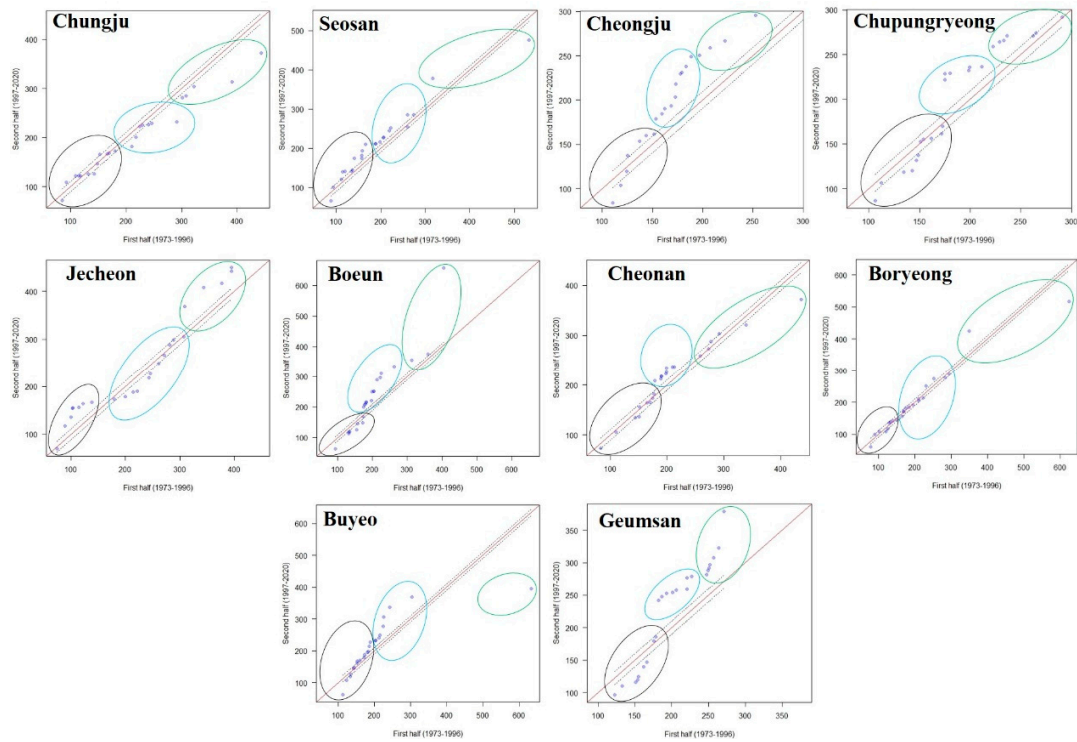

Figure S7. Innovative trend analysis plots for Rx5day.
